# Supplementary material for: ESE3 Inhibits Pancreatic Cancer Metastasis by Upregulating E-Cadherin
Source: Oxford University Press journal article supplement (doi:10.1158/0008-5472.can-16-2170), 2016-12-06
Supplement: 00085472can162170-sup-170172_1_supp_3739735_7ghl1k.doc [file 00085472can162170-sup-170172_1_supp_3739735_7ghl1k.doc]

**Supplementary** Table 1. Antibodies and primers

| **Antibodies** |  | |  | |  |  |
| --- | --- | --- | --- | --- | --- | --- |
| Name | Manufacturer | | Number | | Type | Usage |
| ESE3 | Thermo Fisher | | PA5-30716 | | Polyclonal | WB,IHC,IF |
| E-cadherin | Abcam | | ab76055 | | Monoclonal | WB,IHC,IF |
| β-actin | Cell Signaling Technology | | 8H10D10 | | Monoclonal | WB |
| DAPI | Beyotine Biotechnology | | C1002 | |  | IF |
| **siRNAs** | **sequences (5’-3’)** | |  | |  |  |
| ESE3 #1 | GCCAGUGGCAUGAAAUUCATT/ UGAAUUUCAUGCCACUGGCTT | | | | | |
| ESE3 #2 | CAGCCGAGCUAUGAGAUAUTT/ AUAUCUCAUAGCUCGGCUGTT | | | | | |
| ESE3 #3 | GACGAAGACUGGUAUAUAATT/ UUAUAUACCAGUCUUCGUCTT | | | | | |
| **Primer sequences (5’-3’)** | |  | |  | |  |
| ESE3 | F: TGCAGCATCTGAAGTGGAAC R: AGGAAGGTGACTGGTGGTTG PCR | | | | | |
| E-cadherin | F: TGCCCAGAAAATGAAAAAGG R: GTGTATGTGGCAATGCGTTC | | | | | |
| β-actin | F: CTACCTTCAACTCCATCATGAAGTG R: TGCGCTCAGGAGGAGC | | | | | |
| E-cad-1-P* | F: GGCAGGTGAACCCTC R: AGTTCAGACTCCAGCCC | | | | | |
| E-cad-2-P* -1-P*(2) | F: CTCAGCCAAGTGTAAAAGC R: GGCAGGTGAACCCTC | | | | | |
| E-cad-3-P* | F: AAGACAGAGCGAGACTCC R: CAATACAGGGAGACACAGC | | | | | |
| E-cad-4-P* | F: AATTAGGCCGCTCGA R: CCTGTAGTCCCAGCTACTC | | | | | |

WB: Western blotting; IHC: Immunohistochemistry; IF: Immunofluorescence; siRNA: Small interfering RNA; P*: Promoter

**Supplementary Table 2. Clinicopathologic characteristics of TMA**

| Parameters | Cases (n) | (%) |
| --- | --- | --- |
| Age(years) |  |  |
| <60 | 64 | 53.78 |
| ≥60 | 55 | 46.22 |
| Gender |  |  |
| Male | 68 | 57.14 |
| Female | 51 | 42.86 |
| Histological Grade |  |  |
| G1, G2 | 87 | 73.11 |
| G3 | 32 | 26.89 |
| Tumor size (cm) |  |  |
| <5 | 77 | 64.71 |
| ≥5 | 42 | 35.29 |
| LN metastasis |  |  |
| - | 75 | 63.03 |
| + | 44 | 36.97 |
| Vessel invasion |  |  |
| - | 77 | 64.71 |
| + | 42 | 35.29 |
